# Supplementary material for: IR spectroscopy as a high-throughput screening-technique for enantioselective hydrogen-transfer catalysts
Source: Royal Society of Chemistry journal article supplement (doi:10.1039/b000479k), 2000-01-01
Supplement: b000479k.doc [file b000479k.doc]

*Enantioselective reduction of ketones*: a solution of (*p*-cymene)ruthenium(II) chloride dimer (0.05 mg, 0.083 mol) and the amino alcohol as a ligand (0.33 mol) in dichloromethane (0.1 ml) was added to the chiral alcohol (4.3 mmol) at room temperature under argon. After stirring the mixture for 5 min the ketone (33.3 mol) was added followed by *t*BuOK (0.09 mg, 0.83 mol). The reaction was run at room temperature under argon for the time indicated and monitored by IR and/or GC. *IR-spectroscopy:* reactions were monitored by taking samples out of the reaction vessel or the IR cell was loaded with the reaction mixture thus performing the reaction in the IR cell. Both methods gave the same results. The results shown in figure 1, 2, A, B and C are from reaction performed in the IR cell. The IR-difference spectra from Figure 3 are from samples taken from the reaction mixture after 30 minutes. IR spectra were recorded on a Biorad FTS-60A spectrophotometer and the IR cell was flushed with argon for 2 min prior to use.
