# Supplementary material for: IR spectroscopy as a high-throughput screening-technique for enantioselective hydrogen-transfer catalysts
Source: Royal Society of Chemistry journal article supplement (doi:10.1039/b000479k), 2000-01-01
Supplement: b000479kb.doc [file b000479kb.doc]

Figure B: Dehydrogenation of (*R*)- phenylethanol (left) and (*S*)- phenylethanol (right) using ligand **2**. From these IR-measurements it is clear that ligand **2**  is less selective compared to **1**.
